# Supplementary material
Source: MDPI journal article supplement (https://www.mdpi.com/2227-9717/10/11/2465)
Supplement: s1 [file s1]

**Table S1.** Multiple reaction monitoring (MRM) settings for the analysis of melanin pyrolysate by GC/MS/MS.

| Time segment | Retention time [min] | Compound (Type <sup>b</sup> )                                   | MS transition       |                   | Collision Energy [V] |
|--------------|----------------------|-----------------------------------------------------------------|---------------------|-------------------|----------------------|
|              |                      |                                                                 | Precursor Ion [m/z] | Product Ion [m/z] |                      |
| 1            | 9.6                  | Thiazole (P)                                                    | 85                  | 58                | 15                   |
|              |                      |                                                                 | 58                  | 57                | 12                   |
|              | 10.8                 | Toluene (NS)                                                    | 92                  | 91                | 15                   |
|              |                      |                                                                 | 91                  | 65                | 16                   |
| 2            | 15.7                 | Styrene (NS)                                                    | 104                 | 77                | 27                   |
|              |                      |                                                                 | 104                 | 78                | 15                   |
|              |                      |                                                                 | 103                 | 77                | 14                   |
| 3            | 19.1                 | Phenol (NS)                                                     | 94                  | 65                | 26                   |
|              | 21.4–22.0            | Methylphenol <sup>a</sup> (NS)                                  | 94                  | 66                | 16                   |
|              |                      |                                                                 | 108                 | 107               | 16                   |
|              |                      |                                                                 | 107                 | 77                | 16                   |
| 4            | 24.9                 | 1,2-Benzenediol (NS)                                            | 110                 | 63                | 30                   |
|              |                      |                                                                 | 110                 | 64                | 20                   |
|              |                      |                                                                 | 110                 | 92                | 15                   |
|              | 25.3                 | Benzothiazole (P)                                               | 135                 | 108               | 18                   |
|              |                      |                                                                 | 108                 | 82                | 12                   |
|              |                      |                                                                 |                     |                   |                      |
| 5            | 26.5                 | Indole (NS)                                                     | 117                 | 89                | 30                   |
|              |                      |                                                                 | 117                 | 90                | 16                   |
|              |                      |                                                                 | 90                  | 63                | 27                   |
| 6            | 27.7                 | 4-Hydroxybenzothiazole (P)                                      | 151                 | 96                | 23                   |
|              |                      |                                                                 | 151                 | 123               | 12                   |
|              |                      |                                                                 | 123                 | 96                | 10                   |
|              | 28.1                 | Methylindole (NS)                                               | 130                 | 77                | 27                   |
|              |                      |                                                                 | 130                 | 103               | 14                   |
|              |                      |                                                                 | 103                 | 77                | 10                   |
| 7            | 28.8–29.4            | 2,3-Dihydro-5H-1,4-benzothiazin-5-one <sup>a</sup> (P)          | 165                 | 110               | 18                   |
|              |                      |                                                                 | 165                 | 136               | 22                   |
|              |                      |                                                                 | 136                 | 109               | 16                   |
| 8            | 30.3–30.6            | 7-Methyl-2,3-dihydro-5H-1,4-benzothiazin-5-one <sup>a</sup> (P) | 179                 | 110               | 15                   |
|              |                      |                                                                 | 179                 | 150               | 20                   |
|              |                      |                                                                 | 178                 | 109               | 20                   |
|              | 30.5–30.9            | 4-Hydroxy-6-ethylbenzothiazole <sup>a</sup> (P)                 | 179                 | 164               | 15                   |
|              |                      |                                                                 | 164                 | 109               | 20                   |
|              |                      |                                                                 | 164                 | 136               | 15                   |
| 9            | 31.4                 | 7-Methyl-5H-1,4-benzothiazin-5-one (P)                          | 177                 | 121               | 30                   |
|              |                      |                                                                 | 177                 | 148               | 20                   |
|              |                      |                                                                 | 148                 | 77                | 27                   |

<sup>a</sup> Isomers. <sup>b</sup> P – pheomelanin marker, NS – non-sulfur-containing pyrolysis product.

The two distinct groups of products were monitored in each pyrolysate: heterocyclic compounds with 1,3-thiazole or 1,4 thiazine rings, which are characteristic of thermally degraded pheomelanin (the pheomelanin markers, P) and the products devoid of sulfur (NS). The latter group of compounds are always formed in high yields during the pyrolysis of melanin, irrespective of its structural type and origin, and therefore we use them for normalization of pyrolysis data.
